# Supplementary material for: ETD and sequential ETD localize the residues involved in D2-A2A heteromerization
Source: Royal Society of Chemistry journal article supplement (doi:10.1039/c4ra04757e), 2014-01-01
Supplement: c4ra04757e1.pdf [file c4ra04757e1.pdf]

Supplementary table: Mass and charge states observed for the ETD fragment ions from the [NCX+4H]<sup>4+</sup>(Figure 1C), [NCX+5H]<sup>5+</sup>(Figure 2C), and [NCX+6H]<sup>6+</sup>(Figure 2D).

AP= Acidic peptide SAQEpSQGNT, BP= Basic peptide RRRRKRVTNKRSSR

| Fragment ion | Notation on figure | ETD NCX <sup>4+</sup> (Figure1C) |          |         | ETD NCX <sup>5+</sup> (Figure2C) |          |         | ETD NCX <sup>6+</sup> (Figure2D) |          |         |
|--------------|--------------------|----------------------------------|----------|---------|----------------------------------|----------|---------|----------------------------------|----------|---------|
|              |                    | +                                | 2+       | 3+      | +                                | 2+       | 3+      | +                                | 2+       | 3+      |
| [AP+Z'14]    | <b>z*14</b>        |                                  | 1420.737 | 947.493 |                                  | 1420.73  | 947.496 |                                  | 1420.74  | 947.495 |
| [AP+Z'13]    | <b>z*13</b>        |                                  | 1342.701 | 895.47  |                                  | 1342.703 | 895.478 |                                  | 1342.701 | 895.47  |
| [AP+Z'12]    | <b>z*12</b>        |                                  | 1264.621 |         |                                  |          | 843.425 |                                  |          | 843.429 |
| [AP+C13]     | <b>c*13</b>        |                                  | 1350.201 |         |                                  | 1350.207 | 900.473 |                                  | 1350.206 | 900.474 |
| [AP+C12]     | <b>c*12</b>        |                                  | 1306.684 |         |                                  | 1306.689 | 871.459 |                                  | 1306.689 | 871.458 |
| [AP+C11]     | <b>c*11</b>        |                                  | 1263.168 |         |                                  | 1263.169 | 842.449 |                                  | 1263.171 | 842.446 |
| [AP+C10]     | <b>c*10</b>        |                                  | 1185.119 |         |                                  | 1185.117 | 790.417 |                                  | 1185.122 | 790.418 |
| [AP+C9]      | <b>c*9</b>         |                                  | 1121.07  |         |                                  | 1121.074 |         |                                  | 1121.072 |         |
| [AP+C8]      | <b>c*8</b>         |                                  | 1070.547 |         |                                  | 1070.551 |         |                                  | 1070.549 |         |
| [AP+C7]      | <b>c*7</b>         |                                  | 1013.524 |         |                                  | 1013.525 |         |                                  | 1013.528 |         |
| [AP+C6]      | <b>c*6</b>         | 1926.975                         | 963.993  |         |                                  | 963.984  |         | 1926.976                         | 963.99   |         |
| [AP+C5]      | <b>c*5</b>         | 1770.877                         | 885.942  |         | 1770.882                         | 885.945  |         | 1770.88                          | 885.944  |         |
| [AP+C4]      | <b>c*4</b>         | 1642.783                         | 821.894  |         | 1642.789                         | 821.897  |         | 1642.79                          | 821.897  |         |
| [AP+C3]      | <b>c*3</b>         |                                  |          |         |                                  | 743.852  |         | 1486.693                         | 743.847  |         |
| [Z'9+BP]     | <b>z*9</b>         |                                  | 1420.737 | 947.493 |                                  | 1420.73  | 947.496 |                                  | 1420.74  | 947.495 |
| [Z'8+BP]     | <b>z*8</b>         |                                  | 1377.217 | 918.482 |                                  | 1377.22  | 918.486 |                                  | 1377.219 | 918.487 |
| [Z'7+BP]     | <b>z*7</b>         |                                  | 1341.691 | 894.806 |                                  | 1341.69  |         |                                  | 1341.707 |         |
| [Z'6+BP]     | <b>z*6</b>         |                                  | 1277.675 | 852.116 |                                  | 1277.666 |         |                                  | 1277.674 |         |
| [Z'5+BP]     | <b>z*5</b>         |                                  | 1213.15  | 809.104 |                                  |          |         |                                  |          |         |
| [C8+BP]      | <b>c*8</b>         |                                  | 1377.722 | 918.817 |                                  | 1377.722 | 918.82  |                                  | 1377.721 | 918.822 |
| [C7+BP]      | <b>c*7</b>         |                                  | 1320.706 | 880.805 |                                  |          |         | 1320.689                         | 880.797  |         |
| [C6+BP]      | <b>c*6</b>         |                                  | 1292.196 | 861.798 |                                  |          |         |                                  |          |         |
| [C5+BP]      | <b>c*5</b>         |                                  | 1228.167 | 819.112 |                                  |          |         |                                  |          |         |
| Z'11         | <b>z'11</b>        |                                  |          |         | 1371.812                         |          |         | 1371.812                         | 686.406  |         |
| Z'10         | <b>z'10</b>        |                                  |          |         | 1215.719                         | 608.361  |         | 1215.71                          | 608.361  |         |
| Z'9          | <b>z'9</b>         | 1087.622                         |          |         | 1087.623                         | 544.313  |         | 1087.623                         | 544.313  |         |
| Z'8          | <b>z'8</b>         | 931.518                          |          |         | 931.52                           |          |         | 931.518                          | 466.263  |         |
| Z'7          | <b>z'7</b>         | 832.447                          |          |         | 832.45                           | 416.729  |         | 832.45                           | 416.729  |         |
| Z'6          | <b>z'6</b>         | 718.404                          |          |         | 718.407                          | 359.705  |         | 718.408                          | 359.708  |         |
| Z'5          | <b>z'5</b>         | 617.359                          |          |         | 617.36                           |          |         | 617.359                          |          |         |
| Z'4          | <b>z'4</b>         | 489.264                          |          |         | 489.265                          |          |         | 489.265                          |          |         |
| Z'3          | <b>z'3</b>         |                                  |          |         | 333.164                          |          |         | 333.164                          |          |         |
| Z'2          | <b>z'2</b>         |                                  |          |         | 246.132                          |          |         | 246.132                          |          |         |
| Z'1          | <b>z'1</b>         |                                  |          |         | 159.1                            |          |         |                                  |          |         |
| C3           | <b>c3</b>          | 486.336                          |          |         |                                  |          |         | 486.344                          |          |         |
| C2           | <b>c2</b>          | 330.235                          |          |         | 330.236                          |          |         | 330.236                          |          |         |
| C1           | <b>c1</b>          |                                  |          |         | 174.135                          |          |         |                                  |          |         |
